# Supplementary material for: Morphology dependent electrical conduction and breakdown in single TiO2 nanotubes
Source: Royal Society of Chemistry journal article supplement (doi:10.1039/d0na00713g), 2020-11-27
Supplement: d0na00713g1.pdf [file d0na00713g1.pdf]

## Electronic Supplementary Information

### Morphology dependent electrical conduction and breakdown in single TiO<sub>2</sub> nanotube

Sourav Kumar Kajli,<sup>a</sup> Debdutta Ray<sup>b</sup> and Somnath C Roy<sup>\*a</sup>

<sup>a</sup> Department of Physics, Indian Institute of Technology Madras, Chennai, Tamilnadu-600036, India

<sup>b</sup> Department of Electrical Engineering, Indian Institute of Technology Madras, Chennai, Tamilnadu-600036, India

\*Corresponding Author:

Somnath C Roy; Email: somnath@iitm.ac.in

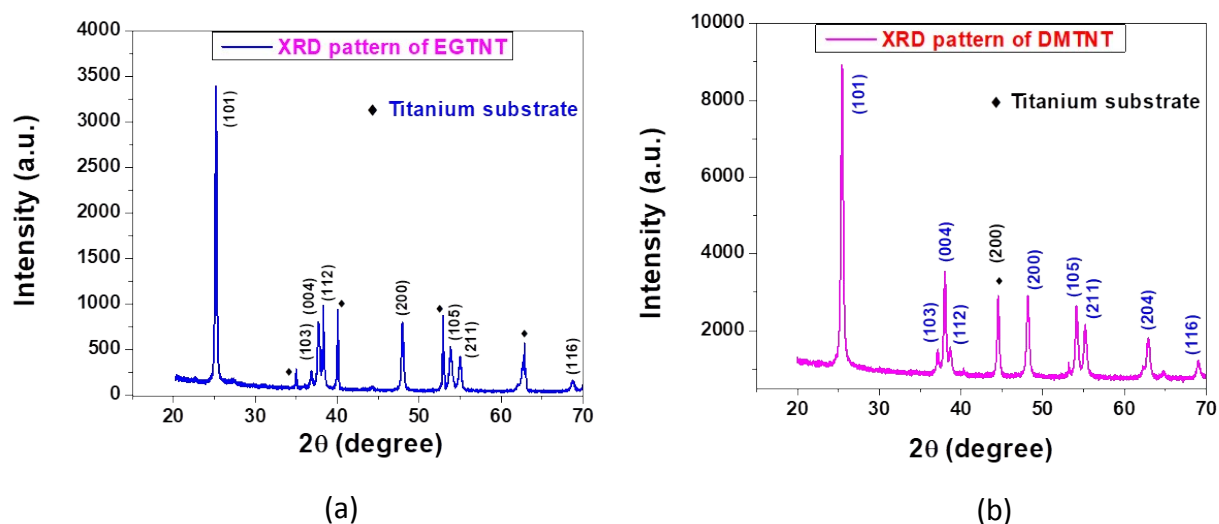

Fig. S1. XRD patterns of (a) EGTNT and (b) DMTNT confirming the anatase phase of both types of nanotube. The peaks are matched with JCPDS card no. 01-071-1169 and 01-073-1764 respectively for matching with anatase phase.
